# Supplementary material
Source: Springer Nature journal article supplement (https://www.springermedizin.de/resource/supplementary/13075_2012_4027_MOESM2_ESM.pdf/9695864)

DAS28 Mean Change From Pre-dose - Part A

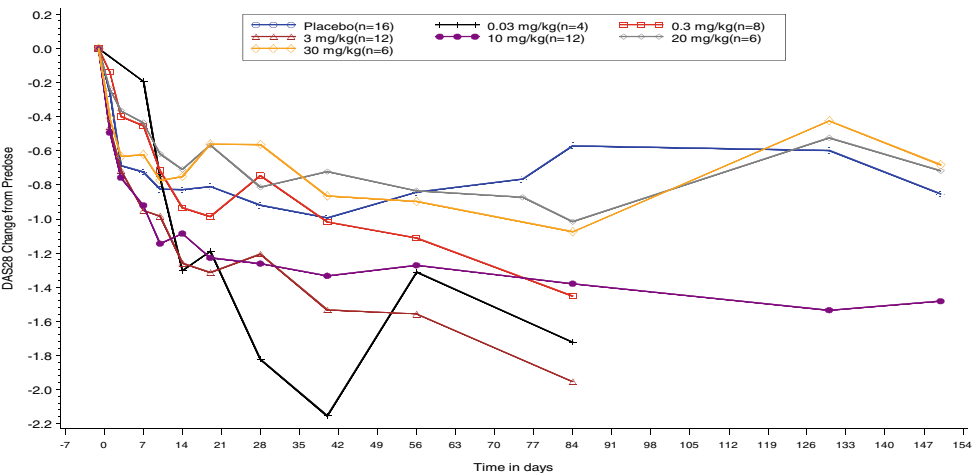

DAS28 Mean Change From Pre-dose - Part B

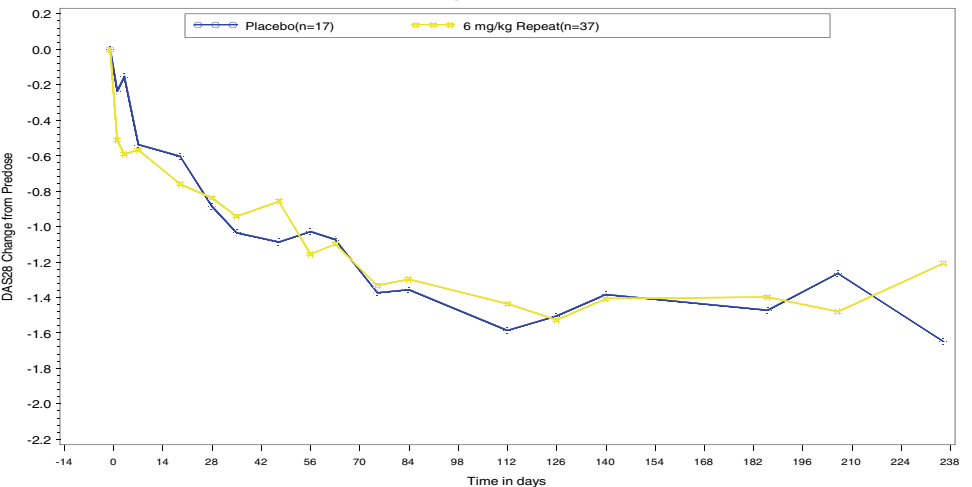

DAS28 Mean Change From Pre-dose - Part C

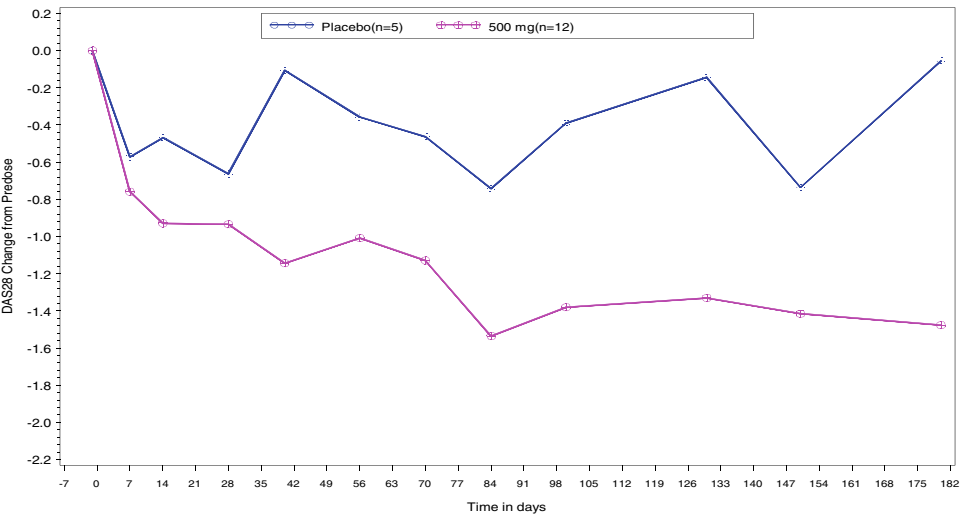

Supplement: MOESM2 [file 9695864]
